# Supplementary material for: Risk factors for pneumonitis in patients with non‐small cell lung cancer treated with immune checkpoint inhibitors plus chemotherapy: A retrospective analysis
Source: PubMed Central journal article supplement (PMC8888158; doi:10.1111/1759-7714.14308), 2022-01-19
Supplement: TCA-13-724-s001.pdf [file TCA-13-724-s001.pdf]

**A**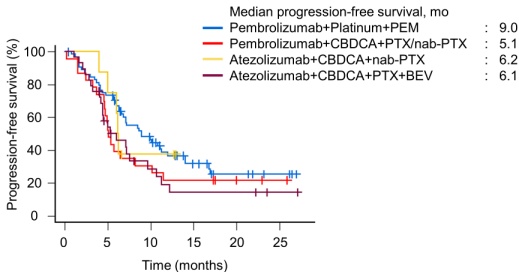

No. at risk

|                                 |    |    |    |    |   |   |
|---------------------------------|----|----|----|----|---|---|
| Pembrolizumab+Platinum+PEM      | 65 | 47 | 26 | 12 | 6 | 3 |
| Pembrolizumab+CBDCA+PTX/nab-PTX | 23 | 13 | 7  | 5  | 3 | 1 |
| Atezolizumab+CBDCA+nab-PTX      | 8  | 6  | 2  | 0  | 0 | 0 |
| Atezolizumab+CBDCA+PTX+BEV      | 29 | 15 | 6  | 3  | 3 | 1 |

**B**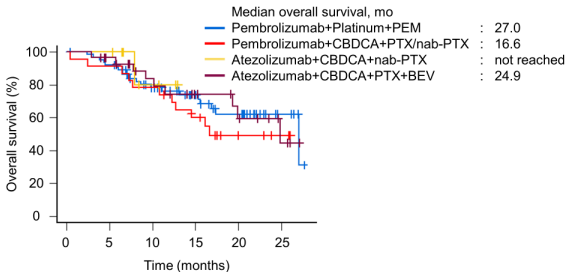

No. at risk

|                                 |    |    |    |    |    |   |
|---------------------------------|----|----|----|----|----|---|
| Pembrolizumab+Platinum+PEM      | 65 | 59 | 40 | 28 | 19 | 5 |
| Pembrolizumab+CBDCA+PTX/nab-PTX | 23 | 21 | 18 | 12 | 6  | 3 |
| Atezolizumab+CBDCA+nab-PTX      | 8  | 8  | 3  | 0  | 0  | 0 |
| Atezolizumab+CBDCA+PTX+BEV      | 29 | 25 | 18 | 12 | 8  | 3 |
